# Supplementary material
Source: Research Square preprint supplement (doi:10.21203/rs.3.rs-10402391/v1)
Supplement: Supplementary file 1 [file d22ef6cde02a57b32deeb30b.docx]

***Severity levels of DSM-5 somatic symptom disorder in medical inpatients: assessing clinical relevance in a cross-sectional sample***

**Supplementary Figure (Fig. S1)**


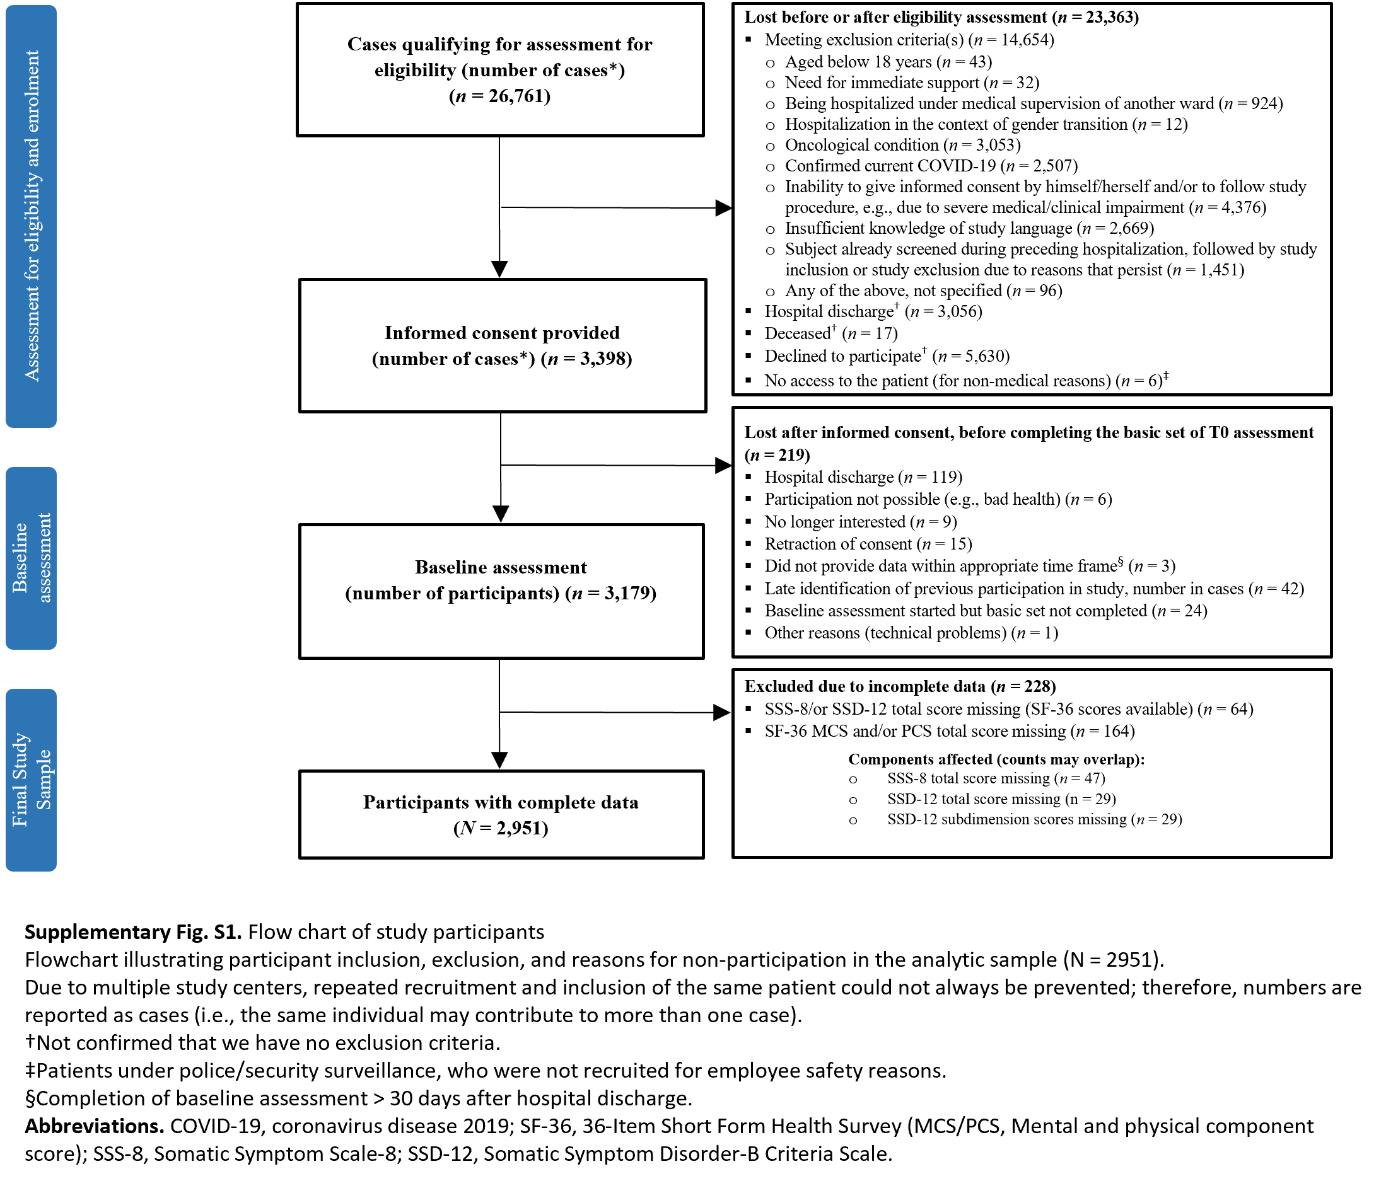


**Supplementary Table S1:**

SSD Criterion C (symptom persistence) was operationalized using ten proxy indicators derived from the SomPsyNet baseline assessment, reflecting sustained or anticipated health-related burden. The operationalization follows our previously published approach, in which detailed distributions of proxy responses have been reported [1]. Criterion C was coded positive if at least one observed proxy met its predefined threshold. Participants with all ten Criterion C proxies missing were coded as missing for Criterion C; otherwise, missing proxy values were ignored when determining whether at least one proxy was positive. These proxies capture aspects of sustained health-related burden and may therefore approximate, but not directly measure, the DSM-5 SSD duration criterion.

| **Supplementary Table S1. Proxies for DSM-5 SSD Criterion C (symptom persistence)** | | | |
| --- | --- | --- | --- |
| **Proxy No.** | **Source** | **Construct** | **Positive Threshold** |
| 1 | Swiss Health Survey (SGB) | Hospital utilization (past 12 months) | ≥1 hospital visit |
| 2 | Swiss Health Survey (SGB) | Emergency service utilization (past 12 months) | ≥1 emergency visit |
| 3 | Swiss Health Survey (SGB) | Outpatient specialist care (past 12 months) | ≥1 visit |
| 4 | SF-36 | Self-rated overall physical health | Likert ≥4 (fair/poor) |
| 5 | SF-36 | Comparative health status (vs. peers) | Likert ≥4 (worse than peers) |
| 6 | Swiss Health Survey (SGB) | Need for support due to health problems | Yes |
| 7 | Swiss Health Survey (SGB) | Duration of support | Permanent need |
| 8 | SomPsyNet item | Sick leave (past 6 months) | ≥2.05 days¹ |
| 9 | SomPsyNet item | Expected pain/symptom severity (in 6 months) | Likert ≥4 (severe/extreme) |
| 10 | SomPsyNet item | Expected impact on daily activities | VAS ≥1 |
|  |  |  |  |
| **Note**. Thresholds were defined to indicate clinically meaningful levels of sustained or anticipated health-related burden. Abbreviations: SF-36, 36-Item Short Form Health Survey; SGB, Swiss Health Survey; VAS, visual analogue scale. ¹ Based on Swiss Federal Statistical Office data (2022), corresponding to the average number of sick leave days over a 6-month period*.* | | | |

**Supplementary Material S2: Missing data handling and selection bias analyses**

*S2.1 Details on SSD-12 subdimension imputation*

At the subdimension level of the SSD-12, imputation was required in 49 (1.7%), 52 (1.8%), and 131 (4.4%) cases for the affective, behavioral, and cognitive subdomains, respectively.

*S2.2 Selection bias analyses*

To assess potential selection bias related to analytic sample inclusion, participants included in the analyses were compared with those excluded due to incomplete data (SSS-8, SSD-12, and SF-36) on key variables using standardized mean differences (SMDs). To examine whether sociodemographic differences were attributable to age, unadjusted and age-adjusted logistic regression analyses were conducted for employment status with pension recipients as the reference category.

Excluded participants (n=228) were on average 11.1 years older than included participants (n=2,951; 71.4±15.8 vs. 60.4±18.7 years; SMD=0.60). Correspondingly, excluded participants more frequently reported being pension recipients (73.5% vs. 43.0%), widowed (22.4% vs. 11.3%), and living alone (43.0% vs. 30.0%), and were more often treated in rehabilitation (26.3% vs. 11.7%; SMD=0.47). Employment status showed the largest sociodemographic difference (SMD=0.71), while all other variables showed small to negligible differences (SMDs=0.05–0.36). Clinical symptom scores were comparable between groups (SSS-8: SMD=0.05; SSD-12: SMD=0.07). After adjusting for age, no employment category differed significantly from pension recipients in odds of analytic inclusion (all *p*≥.077), indicating that employment differences were largely attributable to the age difference between groups.

**Supplementary Material S3: Sensitivity analyses using an alternative SSD-12 subdimension cut-off ≥12**

To examine the robustness of the main findings, all analyses were repeated using a stricter SSD-12 cut-off≥12 instead of ≥10 for the cognitive, affective and behavioral subdimension respectively. The resulting severity distributions, group comparisons, and associations with SF-36 outcomes are presented below. Additionally, age-adjusted ROC analyses were conducted to directly compare the discriminatory performance of both thresholds for identifying impaired mental and physical health status (SF-36 MCS/PCS≤40).

Using the stricter SSD-12 subdimension cut-off≥12, 11.5% (95%CI: 10.4–12.7; n=338) of participants met criteria for at least mild SSD severity. Classifications continued to cluster at the mild 5.8% (95%CI: 5.0–6.7; n=171) and severe 5.4% (95%CI: 4.6–6.2; n=158) ends of the spectrum, with few moderate cases (Fig. S2).


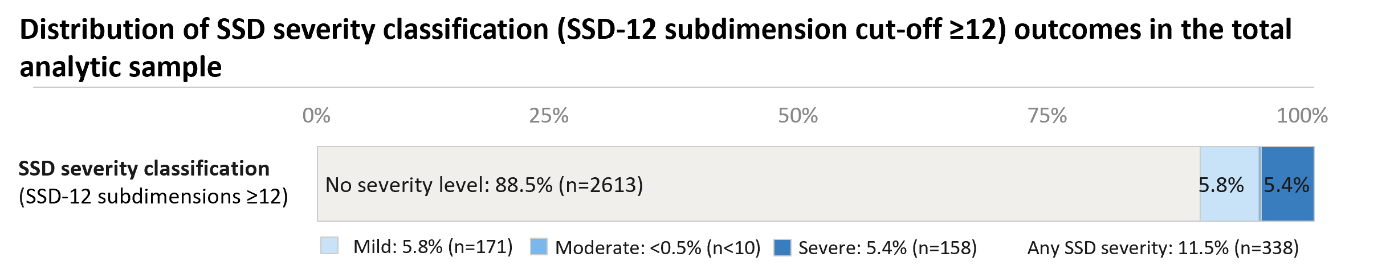


**Fig. S2.** Distribution of somatic symptom disorder (SSD) severity levels using Somatic Symptom Disorder–B Criteria Scale (SSD-12) subdimension cut-off≥12. The figure shows the distribution of DSM-5–aligned SSD severity level classification (no severity, mild, moderate, severe) based on SSD-12 subdimensions using the stricter cut-off≥12. Participants were required to fulfill Criteria A and C. Percentages refer to the total analytic sample (N=2,951). Compared to the primary analysis (cut-off ≥10), overall proportions are lower, while the overall distribution pattern remains comparable, with classifications continuing to cluster predominantly in the mild and severe categories. For data protection reasons, the exact moderate group size is disguised as to not report a group of <10 individuals separately.

Group comparisons largely mirrored the primary findings (Table S2; Fig. S3). Participants with any SSD severity showed markedly lower MCS scores than those without (mean difference: 18.8 points, 95%CI: 17.2–20.3; *p*<.001; SMD=1.32) and lower PCS scores (mean difference: 9.5 points, 95%CI: 8.0–11.1; *p*<.001; SMD=0.59). Within the SSD-positive group, severe cases had lower MCS scores than mild cases (mean difference: 8.6 points, 95%CI: 5.9–11.3; *p*<.001; SMD=0.68), whereas PCS scores did not differ significantly between severity levels (mean difference: 0.6 points, 95%CI: -2.2–3.3; *p*=.692; SMD=0.04).

**Table S2.** Comparisons across SSD severity classification groups (no severity vs any severity; mild vs severe) based on the SSD-12 cut-offs ≥12 for the cognitive, affective and behavioral subdimension

|  | **SSD no**  *†Mean (SD); ‡n (%) [95 %CI]* | **Any severity level**  *†Mean (SD); ‡n (%) [95 %CI]* | **Mean difference** *(95 %CI)* | ***p*-value** | **SMD** | **Mild severity level**  *†Mean (SD); ‡n (%) [95 %CI]* | | **Severe severity level**  *†Mean (SD); ‡n (%) [95 %CI]* | | **Mean**  **difference** *(95 %CI)* | | | ***p*-value** | | **SMD** |
| --- | --- | --- | --- | --- | --- | --- | --- | --- | --- | --- | --- | --- | --- | --- | --- |
| **SSD-12 cut-off ≥12 (subdimension)** | **n = 2613 (88.6 %)**  [87.4; 89.7] | **n = 338 (11.4 %)**  [10.4; 12.7] |  |  |  | | **n = 171 (52.0 %)**  [46.6; 57.3] | | **n = 158 (48.0 %)**  [42.7; 53.4] | |  |  | |  | | |
| Age† | 60.8 ± 18.6  [60.1; 61.5] | 56.8 ± 19.1  [54.8; 58.9] | 4.0 [1.8; 6.1] | **<.001** | 0.21 | | 57.8 ± 19.9  [54.8; 60.8] | | 55.3 ± 18.0  [52.5; 58.2] | | 2.5  [-1.6; 6.6] | .237 | | 0.13 | | |
| **Gender‡** |  |  |  | .811 | 0.01 | |  | |  | |  | .670 | | 0.04 | | |
| Female | 1389 (53.2)  [51.2; 55.1] | 182 (53.9)  [48.5; 59.1] |  |  |  | | 90 (52.6)  [45.2; 60.0] | | 87 (55.1)  [47.3; 62.6] | |  |  | |  | | |
| Male or diverse | 1224 (46.8)  [44.9; 48.8] | 156 (46.2)  [40.9; 51.5] |  |  |  | | 81 (47.4)  [40.0; 54.8] | | 71 (44.9)  [37.4; 52.7] | |  |  | |  | | |
| **Medical specialty‡** |  |  |  | **<.001** | 0.40 | |  | |  | |  | .218 | | 0.27 | | |
| Geriatrics | 262 (10.0)  [8.9; 11.2] | 32 (9.5)  [6.8; 13.1] |  |  |  | | 21 (12.3)  [8.2; 18.1] | | 10 (6.3)  [3.5; 11.3] | |  |  | |  | | |
| Gynecology | 570 (21.8)  [20.3; 23.4] | 42 (12.4)  [9.3; 16.4] |  |  |  | | 23 (13.5)  [9.1; 19.4] | | 18 (11.4)  [7.3; 17.3] | |  |  | |  | | |
| Internal medicine | 1347 (51.6)  [49.6; 53.5] | 195 (57.7)  [52.4; 62.9] |  |  |  | | 98 (57.3)  [49.8; 64.5] | | 92 (58.2)  [50.4; 65.6] | |  |  | |  | | |
| Rehabilitation | 318 (12.2)  [11.0; 13.5] | 27 (8.0)  [5.5; 11.4] |  |  |  | | 12 (7.0)  [4.1; 11.9] | | 13 (8.2)  [4.9; 13.6] | |  |  | |  | | |
| Rheumatology | 116 (4.4)  [3.7; 5.3] | 42 (12.4)  [9.3; 16.4] |  |  |  | | 17 (9.9)  [6.3; 15.4] | | 25 (15.8)  [11.0; 22.3] | |  |  | |  | | |
| MCS (SF-36)† | 46.6 ± 14.3  [46.0; 47.1] | 27.8 ± 13.4  [26.4; 29.3] | 18.8  [17.2; 20.3] | **<.001** | 1.32 | | 31.8 ± 13.9  [29.7; 33.9] | | 23.3 ± 10.9  [21.5; 25.0] | | 8.6  [5.9; 11.3] | **<.001** | | 0.68 | | |
| PCS (SF-36)† | 27.8 ± 16.4  [27.1; 28.4] | 18.3 ± 13.1  [16.9; 19.7] | 9.5  [8.0; 11.1] | **<.001** | 0.59 | | 18.4 ± 14.6  [16.2; 20.7] | | 17.9 ± 10.9  [16.2; 19.6] | | 0.6  [-2.2; 3.3] | .692 | | 0.04 | | |
|  |  |  |  |  |  | |  | |  | |  |  | |  | | |

**Note.** †Continuous variables are reported as mean ± SD [95 %CI]; ‡categorical variables as n (%). Percentages for mild and severe groups are based on the subsample excluding moderate cases (mild and severe only; n=329). The moderate severity group (n<10) was excluded from inferential comparisons between severity groups (mild vs. severe) due to its small sample size. Comparisons between SSD groups (SSD no vs any severity; mild vs severe) were conducted using Welch’s *t*-tests for continuous variables and *χ²* (chi-square) tests for categorical variables. Mean differences are calculated as no severity minus any severity for the first comparison and mild minus severe for the second comparison. Classifications were based on the SSD-12 cut-offs≥12 for the cognitive, affective or behavioral subdimension. Categories with n<10 were not shown. Bold *p*-values indicate statistical significance (*p*<.05). **Abbreviations.** CI=confidence interval; SD=standard deviation; SMD=standardized mean difference; SF-36=Short Form Health Survey; MCS/PCS=Mental/Physical Component Summary; SSD=somatic symptom disorder; SSD-12=Somatic Symptom Disorder–B Criteria Scale.


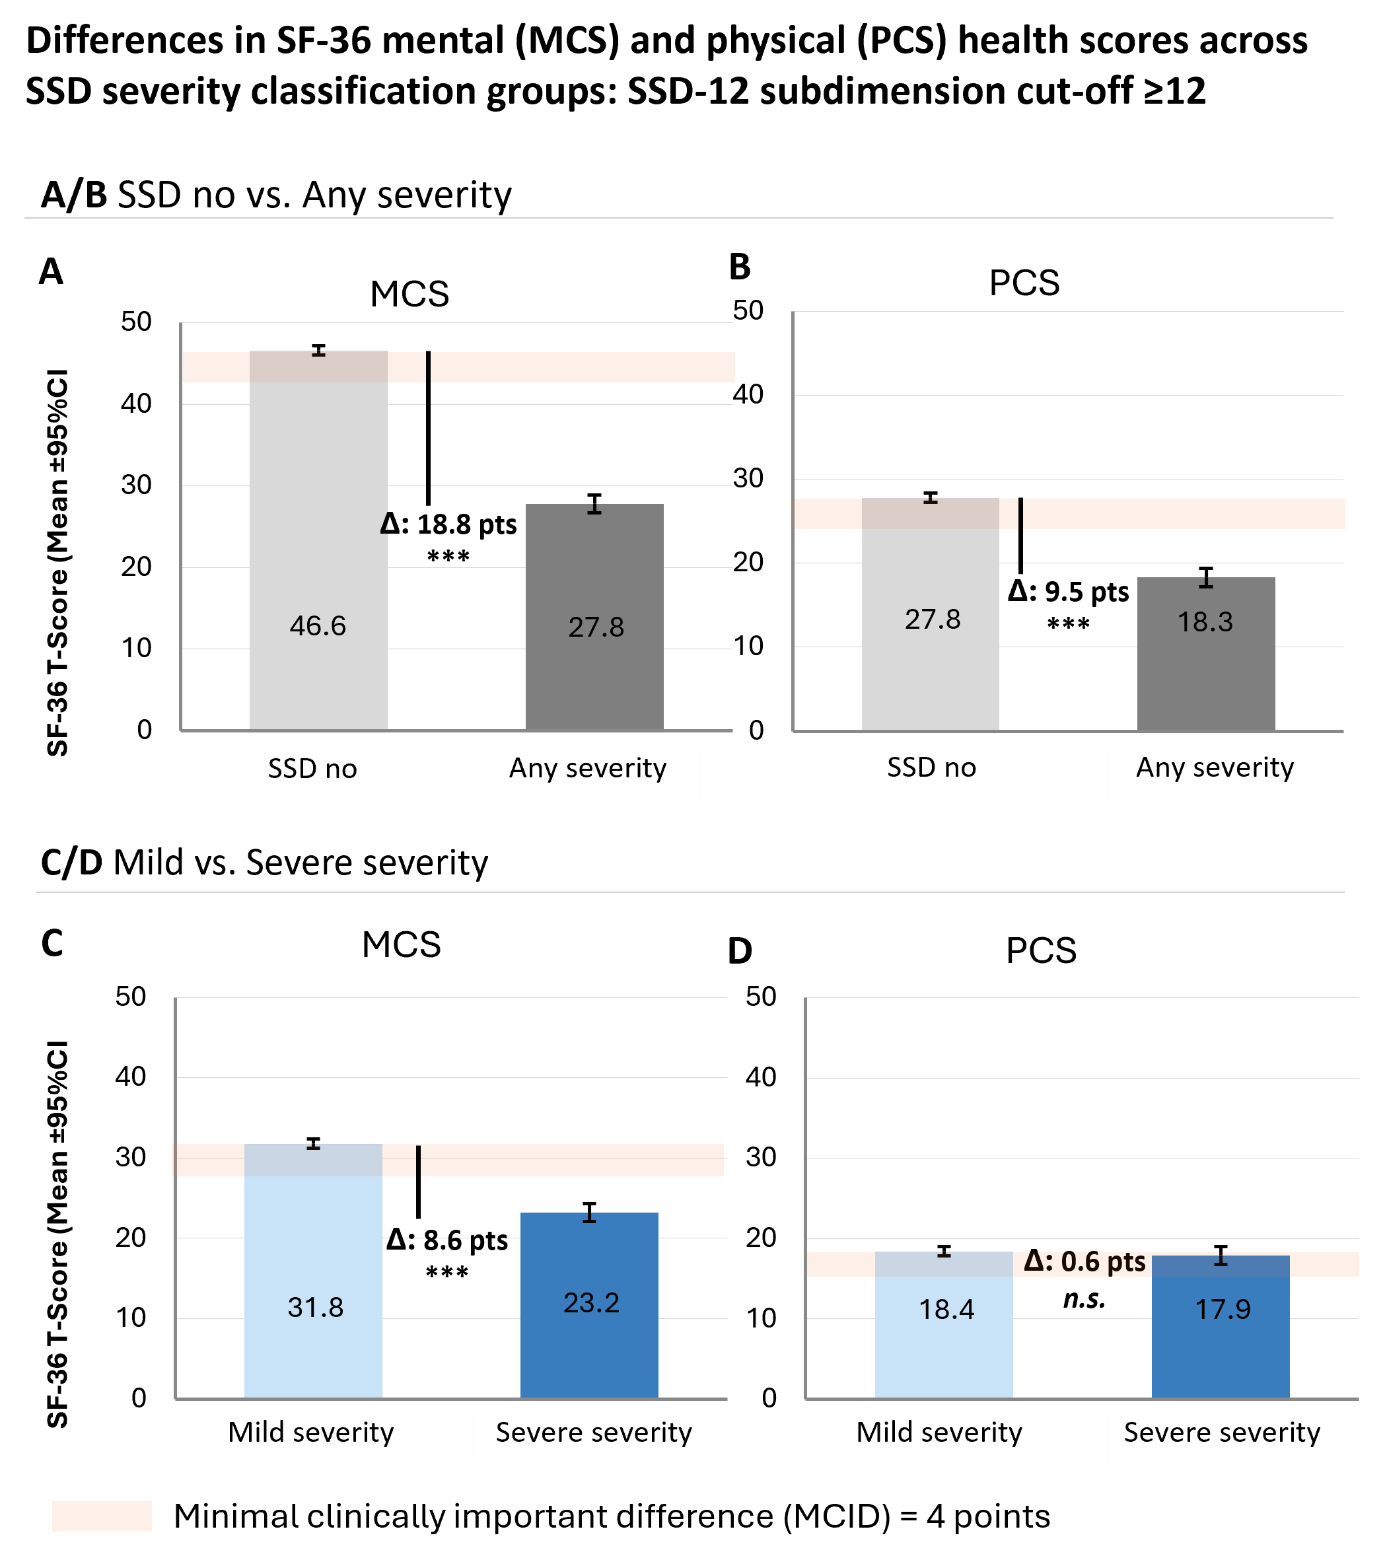


**Fig. S3.** SF-36 (36-item Short Form Health Survey) Mental Component Summary (MCS) and Physical Component Summary (PCS) scores across somatic symptom disorder (SSD) severity classification groups based on a stricter Somatic Symptom Disorder–B Criteria Scale (SSD-12) subdimension cut-off≥12. Panels A and B compare participants with SSD no versus any severity level. Panels C and D compare mild versus severe severity groups (the moderate group was omitted due to its small size). Bars represent mean T-scores with 95% confidence intervals (95% CI). The light pink shaded band indicates the predefined minimal clinically important difference (MCID) of 4 T-score points relative to the reference group in each panel. Asterisks indicate statistical significance from Welch’s t-tests (**p*<.05, ***p*<.01, ****p*<.001); *n.s.* indicates not significant.

In age-adjusted ROC analyses, the primary SSD-12 subdimension cut-off≥10 demonstrated superior discriminatory performance compared with the stricter cut-off≥12 for identifying both impaired mental health status (SF-36 MCS≤40; AUC=0.70 vs. 0.65; ΔAUC=0.04, 95% CI: 0.03–0.06; *p*<.001; Fig. S4, Panel A) and reduced physical health status (SF-36 PCS≤40; AUC=0.68 vs. 0.66; ΔAUC=0.02, 95% CI: 0.01–0.03; *p*=.002; Fig. S4, Panel B).


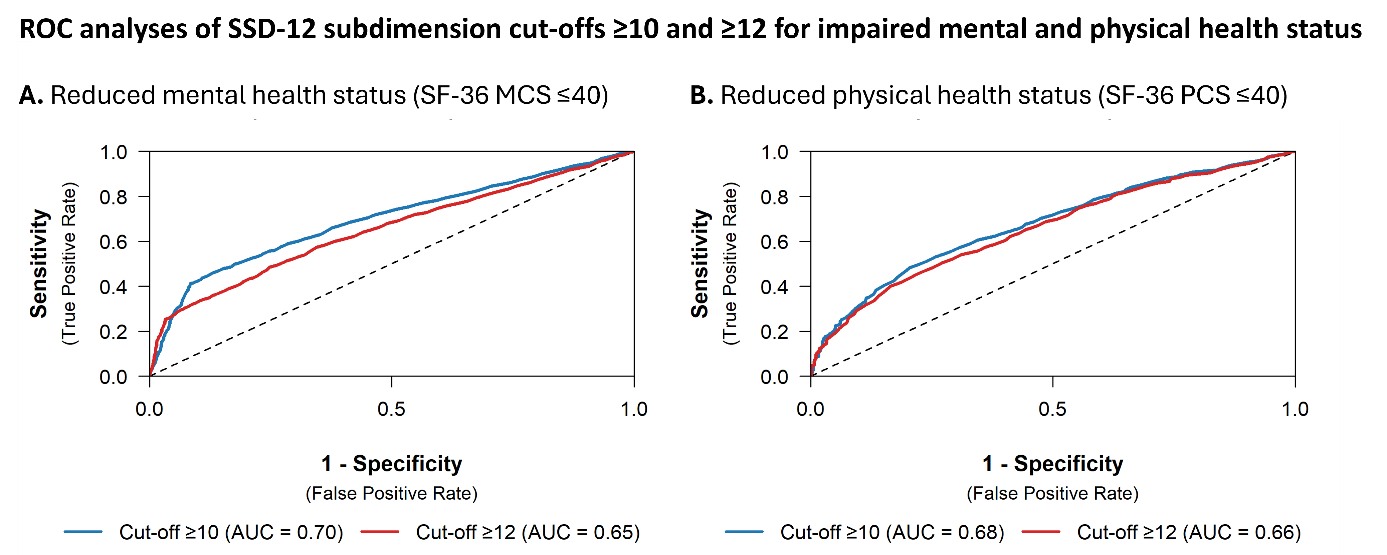


**Fig. S4.** Receiver operating characteristic (ROC) curves for Somatic Symptom Disorder–B Criteria Scale (SSD-12) subdimension cut-offs ≥10 and ≥12 in identifying impaired mental and physical health status, adjusted for age. Panel A shows discrimination for reduced mental health status (36-Item Short Form Health Survey Mental Component Summary [SF-36 MCS] ≤40), with area under the curve (AUC) values of 0.70 (cut-off ≥10; blue) and 0.65 (cut-off ≥12; red). Panel B shows discrimination for reduced physical health status (36-Item Short Form Health Survey Physical Component Summary [SF-36 PCS] ≤40), with AUC values of 0.68 (cut-off ≥10; blue) and 0.66 (cut-off ≥12; red). The dashed diagonal line indicates chance-level discrimination (AUC=0.5).

Overall, findings were consistent with the primary analyses, supporting the robustness of the results.

**References:**

1. Dietsche S, Weeren F, Meinlschmidt G, Toussaint A, Baenteli I, Bahmane S, et al. Assessing DSM-5 criteria of somatic symptom disorder in medically hospitalized inpatients: A cross-sectional analysis. Gen Hosp Psychiatry. 2026;99 December 2025:6–15. https://doi.org/10.1016/j.genhosppsych.2025.12.023.
